1 **Quantitative Detection of Cell Activity by Measuring the Fluctuation of**  
2 **Intracellular Motility**

3

4 Morito Sakuma<sup>#</sup>, Yuichi Kondo and Hideo Higuchi<sup>\*</sup>

5

6 Department of Physics, Graduate School of Science, The University of Tokyo,  
7 7-3-1 Hongo Bunkyo-ku, Tokyo 113-0033, Japan.

8

9 <sup>\*</sup>Correspondence: [higuchi@phys.s.u-tokyo.ac.jp](mailto:higuchi@phys.s.u-tokyo.ac.jp) (H.H.)

10

11 <sup>#</sup> **Present address:** Michael Smith Laboratories, The University of British  
12 Columbia, 2185 East Mall, Vancouver, BC, V6T 1Z4, Canada

13 **Abstract**

14           The measurement of cell activity changes during damage is important to  
15 understand the process of cell death and evaluate the effect of medicines. To  
16 evaluate cell activity generally, we extended the method of intensity fluctuation in  
17 which intensity change in the pixel induced by the movement of organelles was  
18 calculated. Cancer, endothelial and iPS cells were damaged by reactive oxygen  
19 species (ROS) generated by a fluorescent dye (IR700), hydrogen peroxide, and  
20 ultraviolet light. The intensity fluctuation in damaged cells gradually decreased  
21 independent of the kind of cell, indicating that the decrease in the fluctuation is a  
22 general phenomenon in damaged cells. The rupture of vesicles and  
23 mitochondria in the cells were observed upon ROS production. The motility of  
24 purified kinesin and dynein which transport vesicles and organelles was inhibited  
25 by ROS. These suggest that ROS and cytotoxic molecules spreading from  
26 ruptured organelles contribute to the reduction in cell activity which brings about  
27 the decrease in the motility and intensity fluctuation of organelles driven by  
28 kinesin and dynein.

## 29 **Introduction**

30           The intracellular condition of cells is changed by external stresses, such  
31 as oxidation, no physiological pH and toxins. The accumulation of those stresses  
32 leads to cell death (Fujii et al., 2003; Lagadic-Gossmann et al., 2004; Martindale  
33 and Holbrook, 2002; Redza-Dutordoir and Averill-Bates, 2016). In the process of  
34 cell death, the accumulated damage exceeds a certain threshold, and then the  
35 cells switch on the systems for cell death, called apoptosis, or develop  
36 coagulative and liquefactive necrosis (Gascoigne and Taylor, 2009; Letai, 2015).  
37 These processes are common in various types of cells, including pluripotent  
38 stem cells and cancer cells. Therefore, detecting the accumulation of damage is  
39 important to evaluate the effect or tolerance of medicines on cells and their  
40 culture environment.

41           Fluorescent probes have been used to detect changes in intracellular  
42 conditions during cell death by specifically staining proteins related to cell death  
43 (Bussolati et al., 2011; Shi et al., 2012; Yamaguchi et al., 2011; Zhang et al.,  
44 1997; Zhang et al., 2015). However, fluorescence probes have problems such  
45 as photobleaching and phototoxicity. The accuracy of the detection of cell  
46 damage decreases with the decrease in intensity of fluorescent probes induced  
47 by photobleaching (Gerlich and Ellenberg, 2003; Laissue et al., 2017; Waters,  
48 2009). Therefore, fluorescent probes for detecting sequential changes in the  
49 activity longer than ~10 minutes are not available. Conventional microscopes  
50 such as bright field, phase contrast and differential interference contrast  
51 microscopes have been used to detect cell activity and damage for a long time  
52 because they cause essentially no photobleaching or photodamage (Aftab et al.,  
53 2014; Ma et al., 2019; Maddah et al., 2015). In these works, cell activity was  
54 usually detected by the morphological and motility changes of whole cells.  
55 However, since the morphological changes of cells caused by mild cell damage  
56 were not detected and the motility of the cell was stochastic and random, these  
57 methods were not precise and quantitative (Aftab et al., 2014; Balvan et al.,  
58 2015; Tokumitsu et al., 2010). Therefore, to detect precise and quantitative  
59 changes caused by damage over a long time, specific and precise changes in  
60 damaged cells should be detected under a conventional microscope.

61           In previous work, the reduction in the motility of intracellular organelles  
62 was detected without morphological changes of cells under a phase contrast  
63 microscope (Sakuma et al., 2016). This is supported by the result that the  
64 motility of mitochondria was suppressed by cell damage (Debattisti et al., 2017;

65 Liao et al., 2017). The motility of mitochondria gradually decreased just after the  
66 addition of hydrogen peroxide, and the decrease in the motility reached 50%  
67 within 10 minutes (Debattisti et al., 2017). These results suggested that the  
68 effect on the motility of organelles in damaged cells occurred earlier than the  
69 changes in cell morphology and motility. Thus, the method of detecting  
70 intracellular motility under a conventional microscope would overcome the  
71 disadvantages of previous fluorescence, morphological, and cell motility  
72 methods. However, little is understood about the generality and mechanism of  
73 motility reduction.

74 In this study, various cells were damaged by several methods, including  
75 photoactivation of IR700, irradiation with ultraviolet (UV) light and treatment with  
76 hydrogen peroxide (H<sub>2</sub>O<sub>2</sub>), and the change in the motility of organelles was  
77 quantitatively evaluated by the developed intensity fluctuation method (IFM). We  
78 found that all cells showed a decrease in motility caused by damage. To  
79 elucidate the mechanisms of the decrease in motility in damaged cells, we  
80 measured the reduction in the motile speeds of single vesicles in cells and in  
81 purified kinesin and dynein *in vitro* assays. These measurements revealed that  
82 the decrease detected by IMF resulted in the reduction in the organelle motility  
83 driven by motor proteins. Since the transport system commonly exists in animal  
84 cells, the decrease in the motility or transport of organelles would be a universal  
85 phenomenon in various kinds of cells.

## 86 **Results**

87

### 88 **1 Decrement of motility of organelles in damaged cells**

89 Changes in the motility of organelles in damaged cells were evaluated  
90 by the intensity fluctuation method (IFM) in various cell types. Six kinds of cells,  
91 four cancer cell lines, one endothelial cell line, and one iPS cell line, were  
92 damaged by the photoactivation of IR700 dye, which is applied for the targeted  
93 therapy of cancer cells (Mitsunaga et al., 2011). IR700-EGFP was endocytosed,  
94 and the fluorescence of IR700 excited by a red laser was observed inside cells,  
95 especially near the nucleus (first and second columns in Fig. 1a). We applied the  
96 IFM to detect changes in organelle motility. The changes in intensity fluctuation  
97 were shown by heat maps of fluctuation values (third and fourth columns in Fig.  
98 1a). All cells showed a decrease in the fluctuation values induced by  
99 photoactivation for one and ten seconds. The mean intensity fluctuation (see  
100 Materials and methods) for each kind of cell was calculated (Fig. 1b). The  
101 fluctuation values of cells that were illuminated by a red laser without adding  
102 IR700 showed no significant changes (left column in Fig. 1b). The fluctuation  
103 values in the cancer cells and HUVECs were decreased by ~30% and ~50% at 1  
104 and 10 seconds of photoactivation, respectively, and the corresponding values  
105 in iPS cells were decreased by ~15% and ~22% (second and third columns in  
106 Fig. 1b). The fluorescence intensity of IR700 in iPS cells was ~10 times lower  
107 than that in other cells, indicating that the concentration of IR700 endocytosed in  
108 iPS cells was lower than that endocytosed in cancer cells, consistent with the  
109 lower decrease in the fluctuation value. In contrast to the significant fluctuation  
110 change, the shapes of the cells at 1 minute after 10 seconds photoactivation  
111 were not changed (Supplemental Fig. 1c). These results indicated that damage  
112 would significantly reduce the motility of organelles without causing significant  
113 changes in cell shape.

114

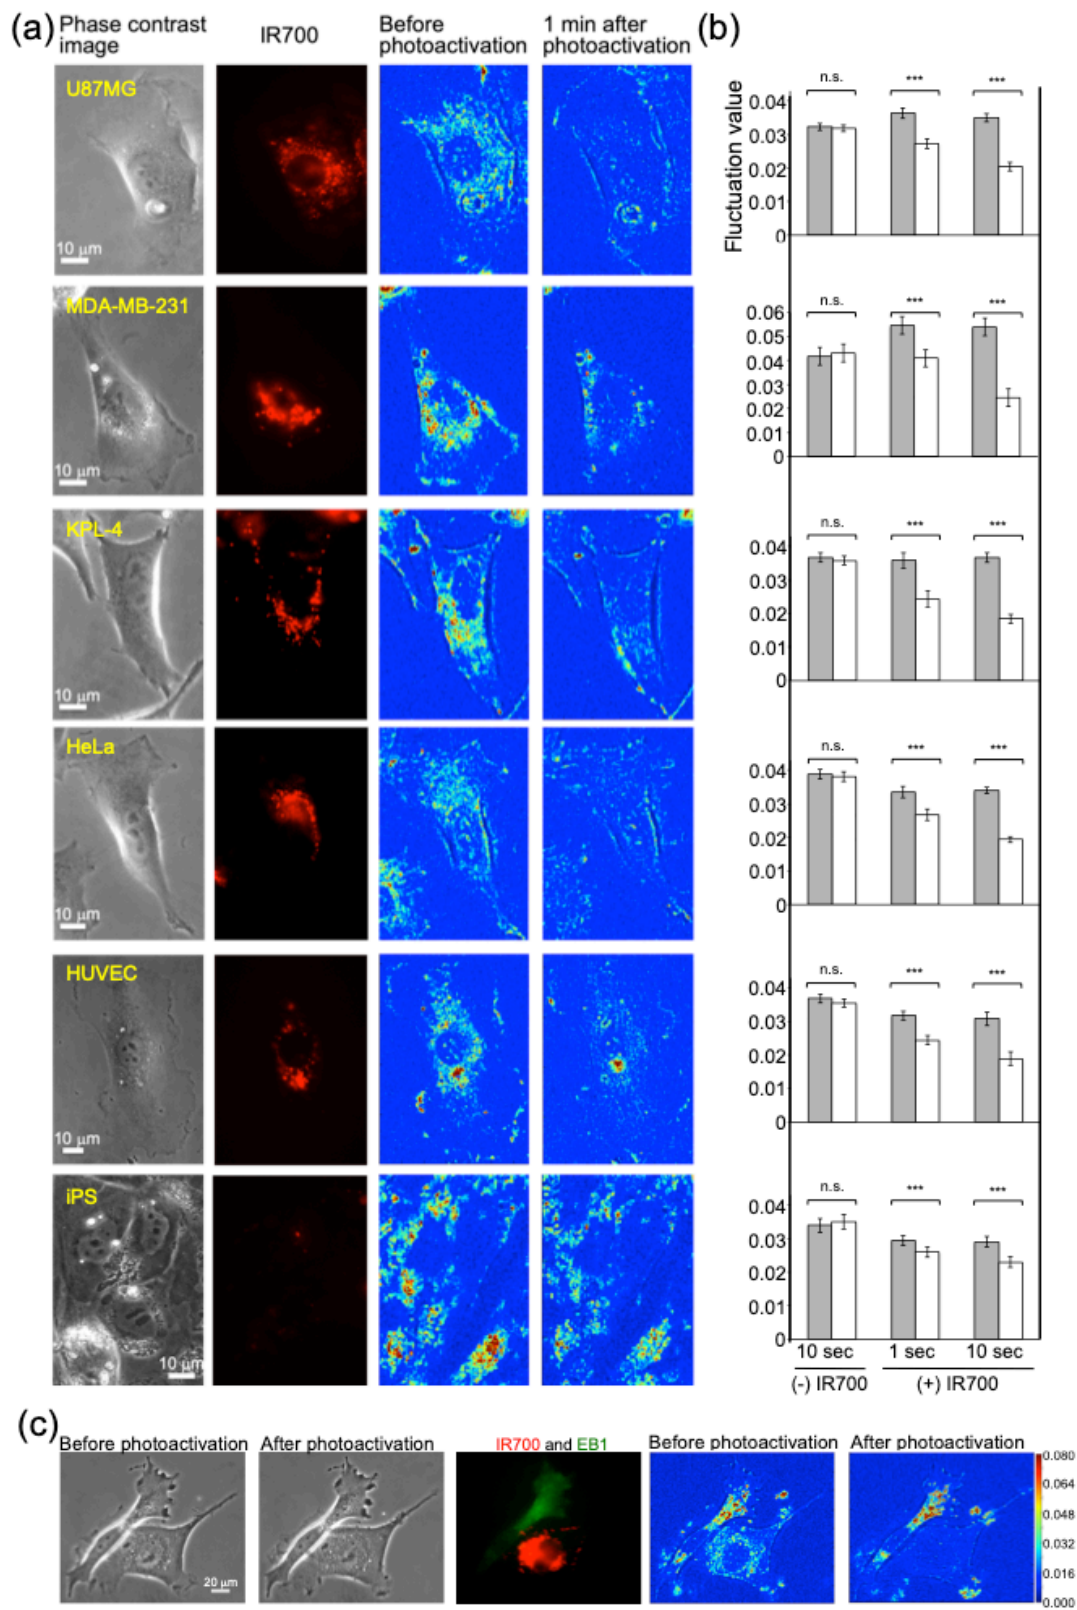

115

116 **Figure 1.** Decreased motility of organelles induced by photoactivation of IR700  
117 in various cell lines. (a) Typical images of the change in motility caused by 10  
118 seconds of photoactivation of IR700 in U87MG, MDA-MB-231, KPL-4, HeLa,  
119 HUVEC, and iPS cells. The first column shows phase contrast images before  
120 cell damage, and the second column shows the fluorescence of IR700  
121 corresponding to the phase contrast images. The third and fourth columns show  
122 heat maps of the change in fluctuation values through photoactivation of IR700  
123 corresponding to the phase contrast images. The scale of the heat maps is the  
124 same as that in Fig. 1c. (b) Change in the mean of the fluctuation values with or  
125 without IR700 (mean  $\pm$  SEM) (n.s. denotes not significant, \*\*\* $p < 0.05$ ). IR700 was  
126 activated for 1 or 10 seconds. (c) Detection of cell damage in co-cultured  
127 U87MG and GFP-EB1-expressing MDA-MB-231 cells. The first and second  
128 columns show phase contrast images before and after 10 seconds of  
129 photoactivation of IR700. The third column shows the fluorescence of IR700 in  
130 U87MG cells and GFP-EB1 in MDA-MB-231 cells. The fourth and fifth columns  
131 show heat maps of the change in fluctuation value induced by IR700  
132 photoactivation.

133

134 U87MG cells containing IR700 and MDA-MB-231-GFP-EB1 cells without  
135 IR700 were cocultured and were illuminated with a red laser (Fig. 1c).  
136 Fluorescence images showed that the left and right cells in Fig. 1c were  
137 MDA-MB-231 and U87MG cells, respectively (third column in Fig. 1c). Phase  
138 contrast images were observed before and at 2 minutes after 10 seconds of  
139 photoactivation (first and second columns in Fig. 1c). While the change in cell  
140 shape caused by photoactivation could hardly be distinguished in the phase  
141 contrast images, the decrease in motility in only U87MG cells after  
142 photoactivation was clearly observed. These results indicate that the IFM  
143 selectively detected the damaged cells.

144 Cell damage was also measured by ethidium homodimer-1 (EthD-1),  
145 which is one of the conventional methods for detecting cell damage. After 1  
146 second of photoactivation, the nuclei of cells were not stained significantly by  
147 EthD-1 (Supplemental Fig. 2). The nucleus was stained at 1 hour but not 30  
148 minutes after photoactivation, suggesting that the IFM detected cell damage  
149 more rapidly than staining with EthD-1.

150

## 151 **2 Motility changes of organelles in oxidative stress**

152 To evaluate whether the decrease in motility could become an indicator  
153 of cell damage, cells were damaged by hydrogen peroxide (H<sub>2</sub>O<sub>2</sub>) treatment and  
154 ultraviolet (UV) light irradiation. H<sub>2</sub>O<sub>2</sub> was added to the culture medium at a final  
155 concentration of 100 μM, and phase contrast images of cells were observed for  
156 4 hours (Fig. 2a). In the phase contrast images, apparent changes in size and  
157 shape could hardly be observed within 60 minutes. At 240 minutes, needle-like  
158 structures were observed near the edge of cells that maintained their  
159 desmosomes. The cell area gradually decreased until 240 minutes (slope: -0.05  
160 (% area/minutes); blue triangles in Fig. 2b). The fluctuation value decreased  
161 exponentially with the time over 10 minutes (red circles in Fig. 2)). A decrease in  
162 the fluctuation was also observed after UV irradiation without a significant  
163 change in cell area (Supplemental Fig. 3). These results indicated that the  
164 intensity fluctuation was decreased by oxidative stress and that the decrease in  
165 the intensity fluctuation was more rapid than the changes in the cell area.



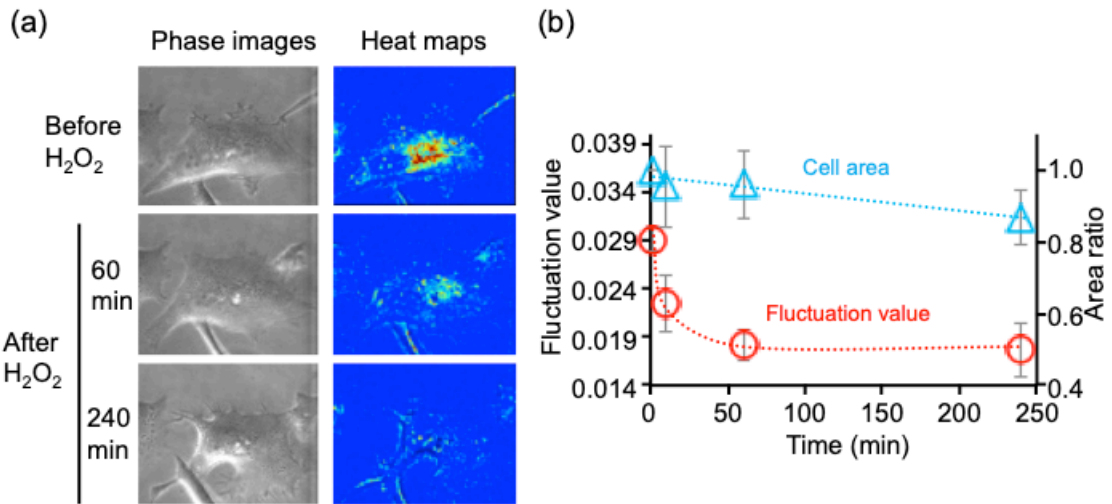

166

167

168

169

170

171

172

173

**Figure 2.** Decreased motility of organelles induced by the addition of hydrogen peroxide (H<sub>2</sub>O<sub>2</sub>). (a) Typical phase contrast images of cell and heat maps of fluctuation values corresponding to the phase contrast images before and after the addition of H<sub>2</sub>O<sub>2</sub>. (b) Change in fluctuation value (red circles) and cell area (light blue triangles) caused by the addition of H<sub>2</sub>O<sub>2</sub> (mean ± SEM). The first and second y-axes denote the mean fluctuation values and area ratios, respectively. Broken lines show exponentially fitted lines.

174

175

### 176 **3 Ruptures of vesicle and mitochondria by photoactivation of IR700**

177 To understand the reason for the reduction in the motility of organelles,  
178 the changes in the intercellular organelles in damaged cells were measured. At 1  
179 hour after adding IR700, most of the IR700 fluorophores were observed near the  
180 nucleus (Fig. 3a). The fluorescence intensity of those vesicles gradually  
181 decreased upon irradiation with the red laser because of photobleaching and  
182 then decreased rapidly at 3-4 seconds (Fig. 3a and b). Diffusion of IR700  
183 fluorescence from the large vesicles to the cytoplasm was also observed  
184 (Supplemental Fig. 4), indicating that vesicles containing IR700 became  
185 ruptured or leaky and that IR700 and toxic molecules, such as protease and  
186 reactive oxygen species, would diffuse in the cytosol.

187 Mitochondria are one of the organelles that could be observed by a  
188 phase contrast microscope. Next, mitochondria were stained with CellROX,  
189 which is an indicator of reactive oxygen species (ROS), to observe their  
190 movement following cell damage. Mitochondria generate ROS and thus can be  
191 stained by CellROX (left and upper panels in Fig. 3c). Under photoactivation, the  
192 tubule-like structure of the mitochondria rapidly disappeared, and the  
193 fluorescence of IR700 did not accumulate in the mitochondria (right and lower  
194 panel in Fig. 3c). At the same time, the fluorescence intensity in the cytoplasm  
195 was increased, indicating that ROS in the mitochondria diffused into the  
196 cytoplasm by mitochondrial rupture, thereby enhancing the fluorescence  
197 intensity of CellROX in the cytoplasm (right and lower panels in Fig. 3c). These  
198 results suggested that vesicles and mitochondria were damaged by the  
199 photoactivation of IR700, and toxic molecules, including proteases and ROS,  
200 diffused from ruptured organelles to the cytoplasm.

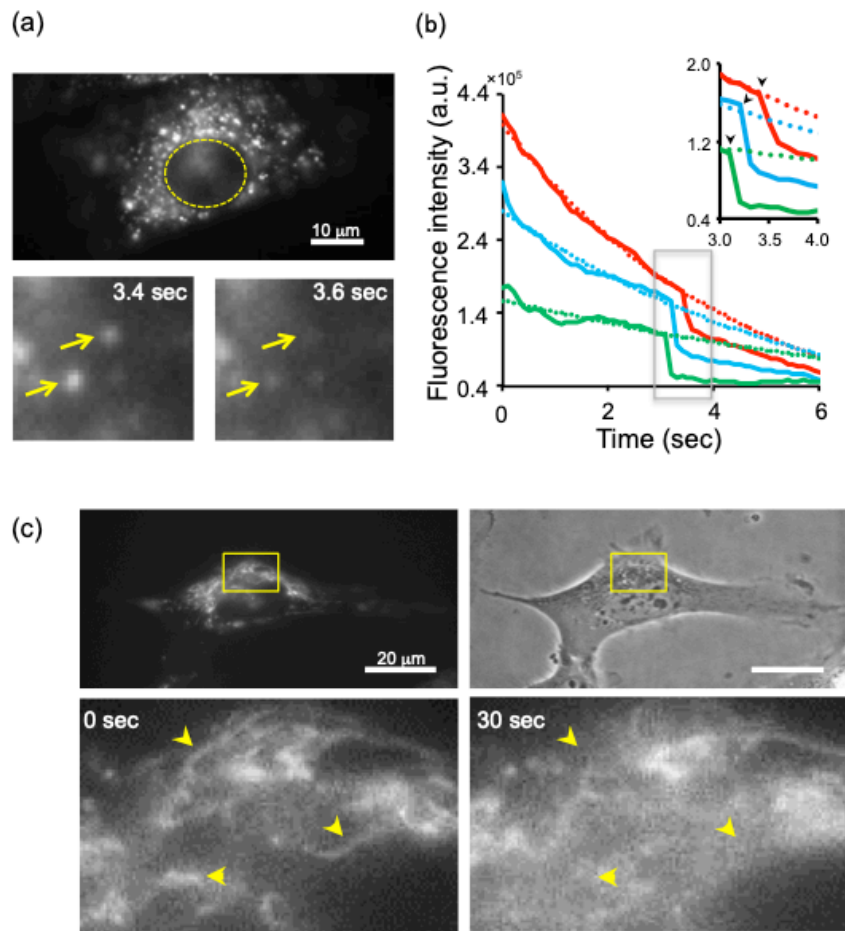

201

202 **Figure 3.** Real-time imaging of damage to organelles induced by the  
203 photoactivation of IR700. (a) Real-time imaging of IR700 fluorescence in  
204 vesicles. The upper image shows the distribution of the fluorescence of IR700.  
205 The yellow broken line shows the periphery of the nucleus. The lower images  
206 show the rapid decrease in IR700 fluorescence in vesicles (yellow arrows). (b)  
207 Trajectories of the fluorescence intensity of IR700. Solid and broken lines show  
208 the change in measured fluorescence intensity and exponentially fitted lines  
209 within 2.5 seconds, respectively. Black arrows in the inset image show the rapid  
210 decrease in the intensity caused by IR700 photoactivation. (c) Dynamics of  
211 mitochondria upon photoactivation of IR700. Upper images show mitochondria  
212 stained by the fluorescent probe CellROX (left) and the corresponding phase  
213 contrast image (right). Lower images show changes in the distribution of  
214 mitochondria upon photoactivation for 30 seconds. Lower images are the  
215 magnified views of the areas in the white rectangles in the upper images. Yellow  
216 arrows indicate that the rod-shaped structure of mitochondria disappeared upon  
217 photoactivation of IR700.

218

#### 219 **4 Motility of vesicles in damaged cells detected by quantum dots**

220 In phase contrast microscopy, various shapes and sizes of organelles  
221 were observed. The IFM mainly detected changes in the motility of organelles  
222 near the nucleus, where endosomes and lysosomes are mainly located. Thus,  
223 the change in those organelles was directly observed and evaluated by  
224 single-particle tracking of QD-EGFR conjugates. QD-EGFR was endocytosed in  
225 vesicles and transported near the nucleus (Fig. 4a). Before damaging the cell,  
226 the vesicle-QDs moved linearly and randomly (blue line in the inset image of Fig.  
227 4b). The linear region is presumably transported by molecular motors such as  
228 kinesin and dynein. After cell damage, the motility of the vesicles was decreased,  
229 and the trajectories of the vesicles-QDs showed confined movement (red line in  
230 the inset image). The mean-square displacements (MSDs) were also decreased  
231 by cell damage. The diffusion coefficients before and after damage were  
232 obtained by fitting the MSD plot with the equation  $4Dt$ , where  $D$  and  $t$  are the  
233 diffusion coefficient and time, respectively. The diffusion coefficients obtained  
234 before and after the damage were  $0.42 \mu\text{m}^2/\text{s}$  and  $0.07 \mu\text{m}^2/\text{s}$ , respectively.  
235 These results indicated that the diffusion after damage was approximately 6  
236 times lower than that before damage.

237 The timing of the decrease in vesicle QDs was evaluated in damaged  
238 cells and compared with the results of the IFM. The fluctuation of the position of  
239 the vesicles-QDs was measured instead of the intensity fluctuation since the  
240 fluorescence intensity of QDs gradually changed upon excitation with a green  
241 laser and photoactivation of IR700 and since the fluctuation of QDs could hardly  
242 be precisely evaluated (Supplemental Fig. 5) (Li et al., 2006). The fluctuation of  
243 position was calculated from the mean standard deviations of the displacement  
244 of vesicles-QDs at every 10 frames (Fig. 4c). The fluctuation of position  
245 gradually decreased after photoactivation of IR700. The time-course change of  
246 the intensity fluctuation under a phase contrast microscope was also measured,  
247 and the decrease was compared between vesicles-QDs and IFM (Fig. 4d). The  
248 intensity fluctuation of organelles gradually decreased in parallel with the  
249 decrease in the fluctuation of the position of the vesicles-QDs, suggesting that  
250 this change in the motility of endosomes and lysosomes was coupled with the  
251 change in the motility of organelles detected by the IFM.

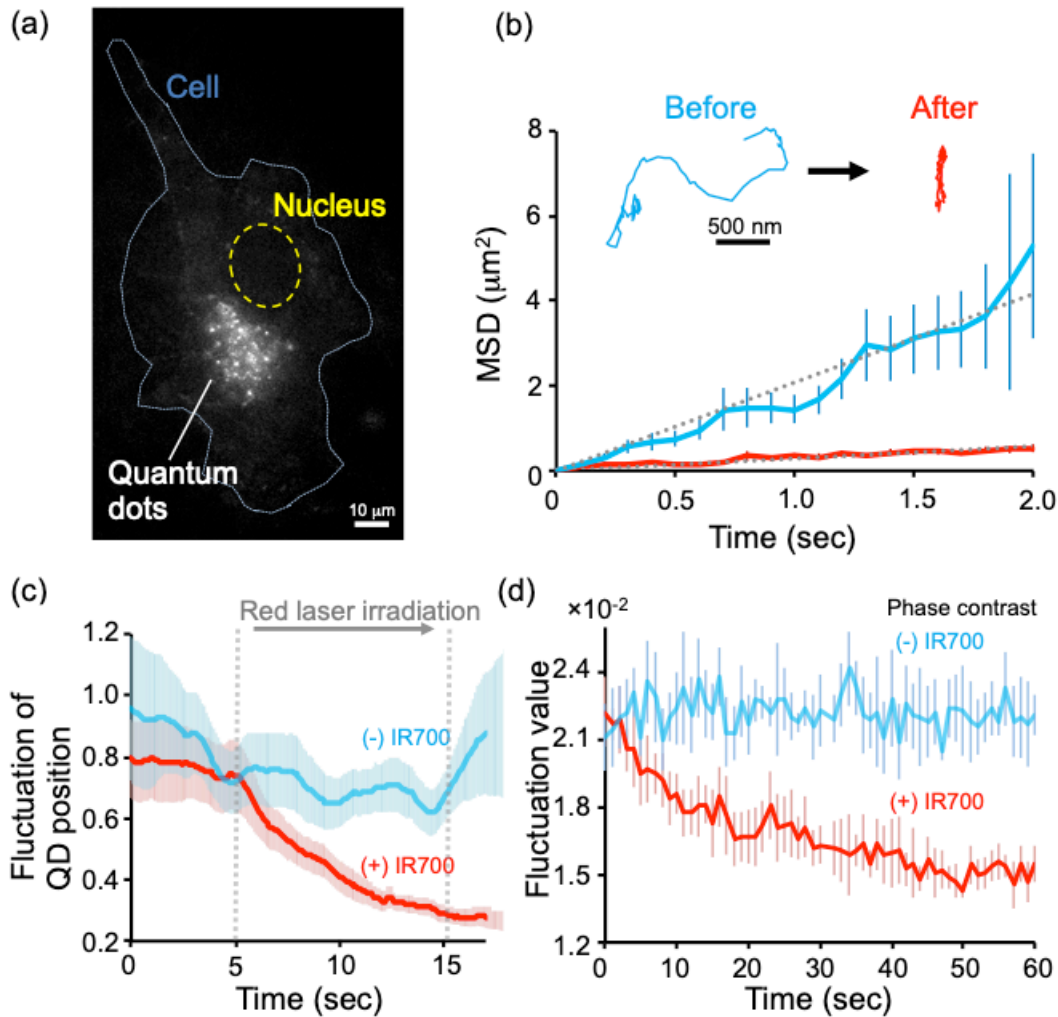

252

253

254

255

256

257

258

259

260

261

262

263

264

**Figure 4.** Single-particle tracking of vesicles labeled with quantum dots (vesicle-QDs) in damaged cells. (a) Distribution of vesicle-QDs inside cells. Blue and yellow broken lines show the periphery of the cell and nucleus, respectively. (b) Mean-square displacement (MSD) plot of the motility of vesicle-QDs before and after IR700 photoactivation (mean  $\pm$  SEM). Light blue and red solid lines show the MSD before and after photoactivation, respectively. Inset image shows a typical trajectory of vesicle-QDs. Broken gray lines show lines linearly fit to the MSD values. (c) Fluctuation of the position of vesicle-QDs upon photoactivation with or without using IR700 (mean  $\pm$  SEM). The cells were irradiated with a red laser from 5 to 15 seconds (gray broken line). (d) Real-time change in fluctuation values calculated from phase contrast images with or without using IR700 (mean  $\pm$  SEM). The cells were irradiated with a red laser from 2 to 32 seconds.

265

266

## 267 **5 Decrease in motilities of kinesin and dynein by oxidative stress**

268 Vesicles including endosomes and lysosomes are transported by  
269 molecular motors, such as kinesin and dynein, along with microtubules.  
270 Therefore, the effects of IR700 photoactivation and hydrogen peroxide (H<sub>2</sub>O<sub>2</sub>)  
271 treatment on motor proteins were evaluated by an *in vitro* motility assay (Fig. 5a)  
272 (Higuchi et al., 2002). Bovine serum albumin (BSA) conjugated with IR700 and  
273 biotin were bound to the surface of a glass chamber. Biotinized kinesin or dynein  
274 was attached to BSA-biotin via streptavidin, and then microtubules were flowed  
275 into the chamber (Fig. 5a). The microtubules were distributed homogeneously  
276 before photoactivation (left column in Fig. 5c). After photoactivation, the  
277 microtubules accumulated within the area of photoactivation as a result of slow  
278 movement, while the motility outside the area was hardly changed (right column  
279 in Fig. 5c). The position of the leading edge of the microtubules was tracked  
280 every 10 seconds to understand the velocity change in response to oxidative  
281 stress (Fig. 5b and d). Microtubules driven by kinesin and dynein moved linearly  
282 and continuously before damage, while the motility decreased very much inside  
283 the red circles (Fig. 5d). The velocity after the photoactivation of IR700 and  
284 addition of H<sub>2</sub>O<sub>2</sub> was analyzed from the trajectories of microtubules inside the  
285 photoactivated area (Fig. 5b). After photoactivation, the mean velocity of the  
286 microtubules driven by kinesin and dynein was decreased from 394 to 6 nm/s  
287 and from 99 to 4 nm/s, respectively. The velocity also decreased from 467 to 48  
288 nm/s at 60 minutes in the presence of 0.1 mM H<sub>2</sub>O<sub>2</sub>. It is noted that the motility of  
289 kinesin was not inhibited by red laser irradiation without using IR700  
290 (Supplemental Fig. 6a). The addition of an ROS scavenging system (GCO $\beta$ )  
291 also prevented the decrease in the motility of kinesin caused by the  
292 photoactivation of IR700 (Supplemental Fig. 6b). These results indicate that the  
293 decrease in the motility of kinesin and dynein was induced by oxidative stress.

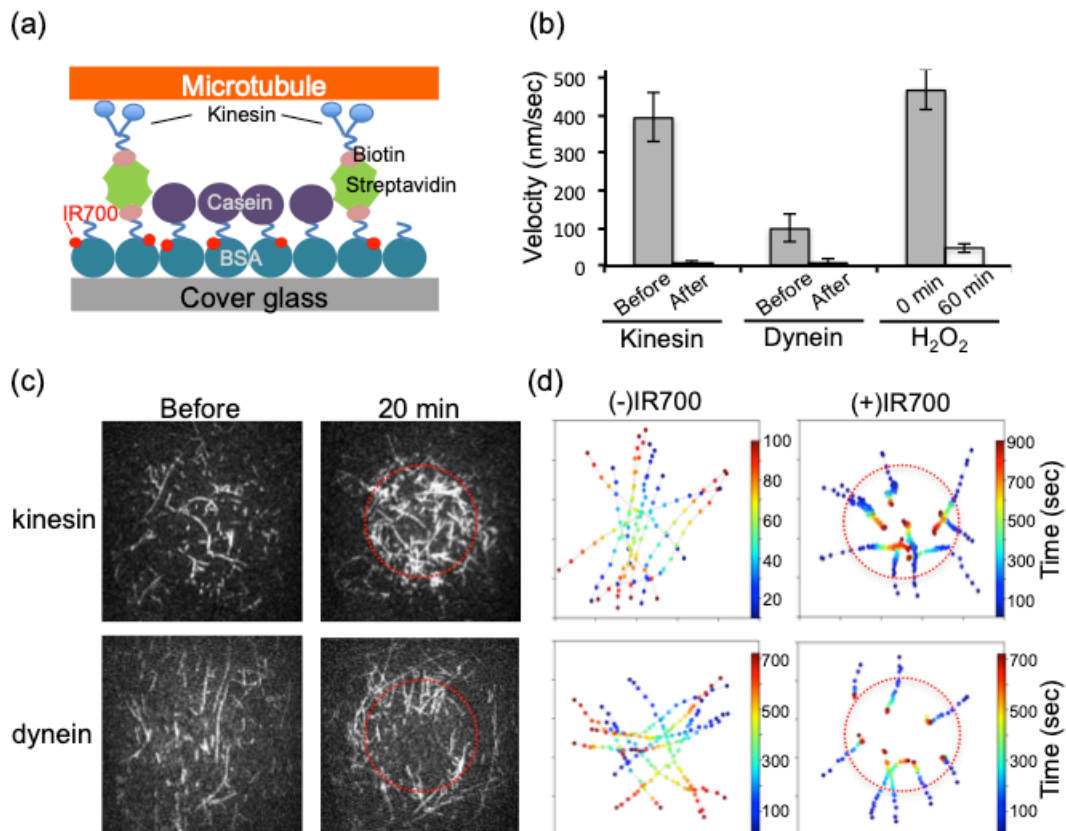

294

295

296

297

298

299

300

301

302

303

304

305

306

307

308

309

**Figure 5.** Motility assay of kinesin and dynein on microtubules under oxidative stress. (a) Schematic illustration of the motility assay. Microtubules were fixed on the cover glass by binding with kinesin or dynein. IR700 binds to BSA through the NHS moiety. Photoactivation of IR700 damages molecular motors and microtubules. (b) Decreased motility of kinesin and dynein upon photoactivation of IR700 and addition of hydrogen peroxide (H<sub>2</sub>O<sub>2</sub>). Gray and white bars indicate the velocity before and after photoactivation and addition of H<sub>2</sub>O<sub>2</sub> (mean ± SEM), respectively. The red laser was irradiated for 100 milliseconds, and the final concentration of H<sub>2</sub>O<sub>2</sub> was 100 μM. (c) Change in the distribution of microtubules caused by photoactivation. The red laser was irradiated during the period inside the red broken lines, and the fluorescence of the microtubules was observed for 20 minutes. (d) Trajectories of microtubules before and after photoactivation. Color bars indicate observation time, and red broken lines denote the spots irradiated with the red laser corresponding to (c).

## 310 **Discussion**

### 311 **Advantage of the intensity fluctuation method (IFM) in detecting cell** 312 **damage**

313 The motility of organelles in several cell lines, including cancer cells,  
314 endothelial cells and iPS cells, was detected by the intensity fluctuation method  
315 (IFM) (Fig. 1a). The sensitivity and quantitativity of measurements of the  
316 fluorescence probes decrease by the photobleaching, phototoxicity and  
317 background of the free probes (Laissues et al., 2017; Waters 2009). Actually, a  
318 background of EthH-1 in the cytoplasm and nucleus was high even in intact cells,  
319 and the fluorescence intensity in the nucleus showed diversity among each cell  
320 (Supplemental Fig. 2). The IMF detected damage of cells even when EthH-1  
321 staining did not detected the damage (Sakuma et al. 2016).

322 Observation of cell morphology and motility under label-free  
323 microscopes such as phase contrast is not so quantitative because of  
324 polymorphism of cell (Ebara et al., 2018; Li et al, 2006; Masuzzo et al., 2016). In  
325 this study, the damage of cell was detected by IFM even when the changes in  
326 the areas and shapes of the cell were not detected (Fig. 2 and Supplemental Fig.  
327 1c). These indicate that the IFM is more sensitive and quantitative than the  
328 fluorescence, motility and morphology methods (Fig. 1, 2, and 4).

329

### 330 **Oxidative stresses induced the decrement of the motility of organelles**

331 Intensity fluctuation that indicates the motility of organelles was  
332 gradually decreased upon IR700 photoactivation, H<sub>2</sub>O<sub>2</sub> treatment, and UV  
333 irradiation. What material generated from these methods suppressed the motility  
334 of organelles? Photoactivation of IR700 was recently developed to specifically  
335 damage cancer cells *in vitro* and *in vivo* (Harada et al., 2015; Nagaya et al.,  
336 2016). Previous research has shown that photoactivation induces cellular  
337 damage by producing ROS and heat (Mitsunaga et al., 2011; Kishimoto et al.,  
338 2015). To specify the effect of photoactivation, we applied a motility assay of  
339 kinesin and dynein to microtubules (Fig. 5). The motility of microtubules inside  
340 the photoactivated region rapidly decreased (Fig. 5b-d). However, the motility of  
341 kinesin in the presence of oxygen scavenging reagents that removed ROS was  
342 almost constant upon IR700 photoactivation (Aitken et al., 2008; Harada et al.,  
343 1990) (Supporting Fig. 6b). Therefore, our results indicated that the production  
344 of ROS induced by the photoactivation of IR700 is a main factor in inhibiting the  
345 motility of motor proteins. H<sub>2</sub>O<sub>2</sub> is one form of ROS and indiscriminately induces



346 oxidation stress toward protein, lipids, mitochondria, and DNA (Redza-Dutordoir  
347 and Averill-Bates, 2016). UV irradiation also produces ROS from cytoplasmic  
348 molecules and damages proteins and DNA (Heck et al., 2003). Therefore, all  
349 methods produced ROS for damaging cells, and the decrease in the motility of  
350 organelles driven by motor proteins would be an indicator of cell damage  
351 induced by ROS.

352

### 353 **Universality of the decrease in the motility of organelles in damaged cells**

354 The intensity fluctuation detected the movement of organelles including  
355 vesicles, mitochondria, Golgi and endoplasmic reticulum. Most animal cells  
356 showed the dynamics of those organelles, and thus, our IFM could easily be  
357 applied to detect damage in various types of cells.

358 We showed the inhibition of organelle transportation at high levels of  
359 ROS. This result is consistent with the finding that an elevated level of ROS  
360 induced by mitochondrial and lysosomal damage is observed during apoptosis in  
361 many cell types (Murphy MP, 2013; Redza-Dutordoir and Averill-Bates, 2016).  
362 Not only ROS but also acid and protease leaked from the damaged mitochondria  
363 and lysosomes would inhibit organelle transportation (Boya and Kroemer, 2008).  
364 Acidification of the cytoplasm is also observed in the process of apoptosis and  
365 with increases in ROS (Clément et al., 1998; Lagadic-Gossmann et al., 2004,  
366 Sakuma et al., 2016). The bacterial cytoplasm showed decreased diffusion at  
367 lower cytoplasmic pH (Maharana et al., 2016), and thus, the change in physical  
368 properties of the cytoplasm would correlate with the decrease in the motility of  
369 organelles. Therefore, a decrease in organelle motility is generally observed in  
370 various types of cell damage and cell death.

371 **Conclusion**

372 Our novel intensity fluctuation method (IFM) analyzing phase contrast  
373 images quantitatively detected cell damage. The reduction in the motility of  
374 organelles in damaged cells was successfully measured by the decrease in  
375 intensity fluctuation. Vesicle transport in damaged cells and the motility of  
376 purified motor proteins were inhibited by cell damage, indicating that a reduction  
377 in the motility of motor proteins and organelle transport would induce a decrease  
378 in the intensity fluctuation. The reduction in the motility of organelles was also  
379 observed upon oxidative stress induced by ultraviolet light irradiation and H<sub>2</sub>O<sub>2</sub>  
380 treatment. Reactive oxygen species would be produced in the process of cell  
381 death, and thus, the decrease in motility would be commonly observed in  
382 damaged cells. Therefore, our IFM would be applicable to the facile and  
383 quantitative detection of several kind of cell damage or cell death.

## 384 **Materials and method**

385

### 386 **Cell culture and preparation**

387 Glioblastoma cells (U87MG, American Type Culture Collection,  
388 Manassas, Virginia), breast cancer cells (KPL-4, Kawasaki Medical School)  
389 (Tada et al., 2007), and cervical cancer cells (HeLa, Cell Resource Center for  
390 Biomedical Research·Cell Bank at Tohoku University) were cultured at 37 °C  
391 with 5% CO<sub>2</sub> and 95% air in Dulbecco's modified Eagle's medium (DMEM,  
392 Sigma-Aldrich, St. Louis, Missouri) supplemented with 10% fetal bovine serum  
393 (FBS, Takara Bio Inc., Shiga, Japan), 1% L-glutamine (Nacalai Tesque, Kyoto,  
394 Japan), and 100 U/mL penicillin-streptomycin (Wako Pure Chemicals Industries,  
395 Osaka, Japan). Wild-type MDA-MB-231 (Summit Pharmaceuticals International)  
396 and GFP-EB1 (end binding protein-1)-expressing MDA-MB-231 cells were  
397 cultured at 37 °C without CO<sub>2</sub> in Leibowitz's L-15 medium (L-15, ThermoFisher  
398 Science, Waltham, Massachusetts) supplemented with 10% FBS, 1%  
399 L-glutamine, and 100 U/mL penicillin-streptomycin. Human umbilical vein  
400 endothelial cells (HUVECs, Thermo Fisher Science) were cultured at 37 °C with  
401 5% CO<sub>2</sub> and 95% air in Medium 200 (Thermo Fisher Science) supplemented  
402 with 50× low serum growth supplement (LSGS, Thermo Fisher Science) and 100  
403 U/mL penicillin-streptomycin. Human induced pluripotent stem cells (iPS, The  
404 Institute of Medical Science, The University of Tokyo) were cultured at 37 °C  
405 with 5% CO<sub>2</sub> and 95% air in ReproFF (ReproCELL, Kanagawa, Japan)  
406 supplemented with 5 ng/mL basic fibroblast growth factor (bFGF, PeproTech  
407 Inc., Rocky Hill, New Jersey). U87MG, KLP-4, HeLa, MDA-MB-231, and  
408 HUVECs were confluent cultured on polystyrene cell culture dishes and  
409 recovered by using 1× TrypLE express enzyme (Thermo Fisher Science). The  
410 concentration of recovered cells was adjusted to  $1.0 \times 10^4$  cells/mL, and the  
411 suspension was seeded on a glass-bottom dish (Matsunami Glass Ind., Ltd.,  
412 Gunma, Japan) coated with 2% collagen. iPS cells were cultured on cell culture  
413 dishes coated with a Matrigel (Corning, Tewksbury, Massachusetts) and formed  
414 colonies. After the size of the colonies reached approximately 1 mm, the cells  
415 were treated with dissociation solution for human ES/iPS cells (ReproCELL) and  
416 recovered by using a cell scraper. The colonies were broken up to approximately  
417 200 μm by gentle pipetting and seeded on a glass-bottom dish coated with  
418 Matrigel. After being cultured for one day at 37 °C, all cells were prepared for the  
419 following experiments.

420

### 421 **Fluorescence staining of cells**

422 Mitochondria in cells were stained by CellROXorange (Thermo Fisher  
423 Science). The final concentration of CellROX was 5  $\mu$ M, and the fluorescence of  
424 CellROX was observed after incubating for 10 minutes at 37 °C and washing.  
425 Quantum dots (QD605) were used to observe the movement of vesicles in cells.  
426 QD605 was conjugated with an antibody against epithelial growth factor receptor  
427 antibody (Abcam, Cambridge, United Kingdom) (QD-EGFR) by using an  
428 antibody conjugation kit (Qdot™ 605 Antibody Conjugation Kit, Thermo Fisher  
429 Science). QD-EGFR was added to the culture medium of cells at a final  
430 concentration of 5 nM, and the cells were incubated for 10 minutes at 37 °C.  
431 After washing three times with culture medium and incubating for 1 hour at 37°C,  
432 the fluorescence of endocytosed QD-EGFR was observed. Cell damage was  
433 evaluated by ethidium homodimer-1 (EthD-1). EthD-1 was added at a final  
434 concentration of 5  $\mu$ M after damaging cells.

435

### 436 **Damaging cells**

437 Cells were damaged by the photoactivation of IR700, addition of  
438 hydrogen peroxide (H<sub>2</sub>O<sub>2</sub>), and irradiation with ultraviolet (UV) light. IRDye  
439 700DX NHS ester (IR700, Li-COR Bioscience, Lincoln, Nebraska) and  
440 anti-EGFR antibody (Abcam) were conjugated for 2 hours at room temperature  
441 in 10 mM Na<sub>2</sub>HPO<sub>4</sub> (pH 8.0) (Mitsunaga et al., 2011). The conjugates  
442 (IR700-EGFR) were added to the culture medium of cells at a final concentration  
443 of 1  $\mu$ M, and the cells were incubated for 1 hour at 37 °C and washed two times  
444 with culture medium. To damage cells by oxidative stress, the cells were treated  
445 with hydrogen peroxide (H<sub>2</sub>O<sub>2</sub>, Wako Pure Chemicals). H<sub>2</sub>O<sub>2</sub> was added to the  
446 culture medium of cells at a final concentration of 100  $\mu$ M. After the addition of  
447 H<sub>2</sub>O<sub>2</sub>, the cells were continuously observed by a phase contrast microscope.  
448 Cells were damaged by ultraviolet (UV) light at a wavelength of 360-370 nm  
449 including a Hg-lamp spectrum. A fluorescence filter set (excitation filter:  
450 BP360-370, emission filter: BA420, dichromatic mirror: DM400, U-MNUA2,  
451 Olympus, Tokyo, Japan) and a mercury lamp (Olympus) were used for UV light  
452 irradiation, and the cells were irradiated with UV light for 10 seconds.

453

### 454 **Fluorescence microscopy for observing cells and proteins**

455 All images of cells were taken by an inverted microscope (IX-70,

456 Olympus) equipped with a phase contrast objective lens (PLAPON 60XOPH,  
457 Olympus), halogen and mercury lamps (U-LH100 and U-ULS100HG, Olympus),  
458 EMCCD cameras (iXon 3, Andor Technology Ltd., Belfast, Northern Ireland),  
459 and an incubator (TOKAI HIT Co., Ltd., Shizuoka, Japan) as reported previously  
460 with modifications (Sakuma et al., 2016). The temperature and concentration of  
461 CO<sub>2</sub> were maintained at 37 °C and 5%, respectively, by the incubator. During  
462 the acquisition of phase contrast images, halogen light was passed through a  
463 510-550 nm bandpass filter to prevent photoactivation of IR700. IR700 was  
464 photoactivated by using a red laser (635 nm, 100 mW, Barrington, Edmund  
465 Optics, New Jersey), and the fluorescence was observed by a camera equipped  
466 with a 690-730 bandpass filter. The fluorescence of QD-EGFR, CellROX,  
467 rhodamine, and EthD-1 was observed with illumination by a green laser (532 nm,  
468 Showa Optronics, Tokyo, Japan) and detected by a camera (EMCCD, Andor  
469 iXon-plus 885) equipped with a 600-620 nm bandpass filter. GFP-EB1 was  
470 observed under a blue laser (488 nm, Showa Optronics) and detected by a  
471 camera equipped with a 510-550 nm bandpass filter.

472

#### 473 **Intensity fluctuation method (IFM) to detect cell damage**

474 To detect the motility change of organelles caused by cell damage, the  
475 intensity fluctuation of pixels in phase contrast images was calculated. The  
476 intensity fluctuation ( $\Delta I / \langle I \rangle$ ) was calculated by the standard deviation ( $\Delta I$ ) of the  
477 intensity divided by the mean intensity ( $\langle I \rangle$ ) of a pixel according to previous  
478 methods with modification (Sakuma et al., 2016). The phase contrast images of  
479 cells were taken for 300 frames at 10 (Fig. 4d) or 20 (other figures)  
480 frames/second. To enhance the movement of organelles, the phase images  
481 were processed by a bandpass filter with a bandwidth of 3-10 pixels (390-1300  
482 nm) included in ImageJ software (Sakuma et al., 2016). Then, all phase contrast  
483 images were processed with 4 × 4 binning to reduce the number of pixels in  
484 order to reduce the intensity noise and save calculation time. The intensity  
485 fluctuation was calculated every 10 frames (1 and 0.5 seconds). A total of 6  
486 rectangles in each cell with a size of 36 (6 × 6) binned pixels were selected  
487 randomly near the nucleus (Supplemental Fig. 1a). The mean intensity  
488 fluctuation of 36 binned pixels was defined as one set of intensity fluctuations.  
489 The p-value of fluctuation values between damaged and non-damaged cells  
490 from Student's t-test was 0.07±0.04 (mean ± SE for 4 cells) at one set (10  
491 frames in Supplemental Fig. 1b; p-value was out of range). To reduce the

492 p-value, the mean  $\pm$  SE of multiple sets of fluctuation was calculated. The  
493 p-value decreased with increasing number of sets (or frames) (green rectangles  
494 in Supplemental Fig. 1b). To ensure a significant difference between the  
495 damaged and non-damaged cells, we took the mean of 30 sets (or 300 frames)  
496 as the intensity fluctuation. Custom code in Python was used for the calculation  
497 and creation of heat maps.

498

### 499 **Single-particle tracking of vesicles by using quantum dots**

500 Vesicles inside cells were labeled by quantum dot-EGFR conjugates  
501 (QD-EGFR). The fluorescence of vesicles was observed for 17 seconds at 10  
502 frames/s including the photoactivation period (10 seconds) of IR700. The  
503 localization of vesicles was estimated by fitting fluorescence-intensity profiles of  
504 QDs with a two-dimensional Gaussian function (Yildiz and Selvin, 2005). From  
505 the trajectories, the ensemble-averaged mean-square displacement (MSD) was  
506 calculated by the following equation:

$$MSD(t) = \frac{1}{N} \sum_{i=1}^N ((x_i(t) - x_i(0))^2 + (y_i(t) - y_i(0))^2)$$

507 where  $N$  is the number of particles and  $x_i(t)$  and  $y_i(t)$  are the coordinates of  
508 particle  $i$  at time  $t$ . In total, 32 and 29 particles with and without IR700,  
509 respectively, were tracked, and then the MSD was calculated on each trajectory.  
510 The mean MSD from  $t = 0$  to 2 seconds was calculated and fitted to a linear  
511 equation for estimating the diffusion coefficient ( $D$ ) using the equation  $MSD =$   
512  $4Dt$  (Maharana et al., 2016).

513 The fluctuation of the localization of QDs was calculated from the  
514 standard deviation of the displacement of the QDs. The standard deviation of the  
515 displacement in 10 frames was calculated and then shifted by one frame in a  
516 similar manner to a moving average through a total of 170 frames.

517

### 518 **Motility assay of kinesin and dynein**

519 A motility assay of kinesin and dynein was performed on cover glass in a  
520 flow chamber (Fig. 5a). First, 1 mg/mL bovine serum albumin (BSA) conjugated  
521 with biotin was flowed to cover the surface of the glass. Then, IR700 was flowed  
522 to conjugate with the BSA through the NHS moiety. Next, 1 mg/mL streptavidin  
523 was flowed to bind with biotin, and then 0.5 mg/mL casein was flowed to prevent  
524 the nonspecific binding of kinesin and dynein to BSA or the glass surface. Dimer

525 kinesin (mouse KIF5A with 490 amino acid) or dynein (human dynein-1,  
526 GST-D384) labeled with BDTC were flowed to bind with streptavidin, and tubulin  
527 flowed. Purification of kinesin, dynein, and microtubules and labeling of the  
528 microtubules by rhodamine were carried out according to previous reports  
529 (Kinoshita et al., 2018). By adding 1 mM of ATP, the gliding of microtubules  
530 labeled with rhodamine was observed by fluorescence microscopy

531 **Acknowledgements**

532

533 We thank Grant-in-Aid for Scientific Research on Scientific Research (A)  
534 and (B) (H.H. 23247022, 16H04773) from the Japan Society for the Promotion of  
535 Science and Scientific Research (C) (S.K. 26440075)

536

537

538 **Competing interests**

539

540 No potential conflict of interest was reported by the authors.



541 **References**

- 542 Aftab O, Nazir M, Fryknäs M, Hammerling U, Larsson R, Gustafsson MG. 2014.  
543 Label free high throughput screening for apoptosis inducing chemicals  
544 using time-lapse microscopy signal processing. *Apoptosis* **19**:1411–1418.  
545 doi:10.1007/s10495-014-1009-9
- 546 Aitken CE, Marshall RA, Puglisi JD. 2008. An oxygen scavenging system for  
547 improvement of dye stability in single-molecule fluorescence experiments.  
548 *Biophys J* **94**:1826–1835. doi:10.1529/biophysj.107.117689
- 549 Balvan J, Krizova A, Gumulec J, Raudenska M, Sladek Z, Sedlackova M, Babula  
550 P, Sztalmachova M, Kizek R, Chmelik R, Masarik M. 2015. Multimodal  
551 holographic microscopy: Distinction between apoptosis and oncosis. *PLoS*  
552 *One* **10**:1–16. doi:10.1371/journal.pone.0121674
- 553 Boya P, Kroemer G. 2008. Lysosomal membrane permeabilization in cell death.  
554 *Oncogene* **27**:6434–6451. doi:10.1038/onc.2008.310
- 555 Bussolati O, Belletti S, Gatti R, Gazzola GC, Orlandini G, Dall’Asta V. 2011.  
556 Comparison of Annexin V and Calcein-AM as Early Vital Markers of  
557 Apoptosis in Adherent Cells by Confocal Laser Microscopy. *J Histochem*  
558 *Cytochem* **46**:895–900. doi:10.1177/002215549804600804
- 559 Clément MV, Ponton A, Pervaiz S. 1998. Apoptosis induced by hydrogen  
560 peroxide is mediated by decreased superoxide anion concentration and  
561 reduction of intracellular milieu. *FEBS Lett* **440**:13–18.  
562 doi:10.1016/S0014-5793(98)01410-0
- 563 Debattisti V, Gerencser AA, Saotome M, Das S, Hajnóczy G. 2017. ROS  
564 Control Mitochondrial Motility through p38 and the Motor Adaptor Miro/Trak.  
565 *Cell Rep* **21**:1667–1680. doi:10.1016/j.celrep.2017.10.060
- 566 Ebata H, Yamamoto A, Tsuji Y, Sasaki S, Moriyama K, Kuboki T, Kidoaki S.  
567 2018. Persistent random deformation model of cells crawling on a gel  
568 surface. *Sci Rep* **8**:1–12. doi:10.1038/s41598-018-23540-x

- 569 Fujii J, Matsui T, Heatherly DP, Schlegel KH, Lobo PI, Yutsudo T, Ciruolo GM,  
570 Morris RE, Obrig T. 2003. Rapid apoptosis induced by Shiga toxin in HeLa  
571 cells. *Infect Immun* **71**:2724–2735. doi:10.1128/IAI.71.5.2724-2735.2003
- 572 Gascoigne KE, Taylor SS. 2009. How do anti-mitotic drugs kill cancer cells? *J*  
573 *Cell Sci* **122**:2579–2585. doi:10.1242/jcs.039719
- 574 Gerlich D, Ellenberg J. 2003. 4D imaging to assay complex dynamics in live  
575 specimens. *Nat Rev Mol Cell Biol* **4 Suppl**:S14–S19. doi:10.1038/ncb1033
- 576 Harada T, Nakamura Y, Choyke PL, Sato K, Nagaya T, Kobayashi H. 2015.  
577 Near Infrared Photoimmunotherapy Targeting EGFR Positive Triple  
578 Negative Breast Cancer: Optimizing the Conjugate-Light Regimen. *PLoS*  
579 *One* **10**:e0136829. doi:10.1371/journal.pone.0136829
- 580 Harada Y, Sakurada K, Aoki T, Thomas DD, Yanagida T. 1990.  
581 Mechanochemical coupling in actomyosin energy transduction studied by in  
582 vitro movement assay. *J Mol Biol* **216**:49–68.  
583 doi:10.1016/S0022-2836(05)80060-9
- 584 Heck DE, Vetrano AM, Mariano TM, Laskin JD. 2003. UVB light stimulates  
585 production of reactive oxygen species: Unexpected role for catalase. *J Biol*  
586 *Chem* **278**:22432–22436. doi:10.1074/jbc.C300048200
- 587 Higuchi H, Muto E, Inoue Y, Yanagida T. 2002. Kinetics of force generation by  
588 single kinesin molecules activated by laser photolysis of caged ATP. *Proc*  
589 *Natl Acad Sci* **94**:4395–4400. doi:10.1073/pnas.94.9.4395
- 590 Kinoshita Y, Kambara T, Nishikawa K, Kaya M, Higuchi H. 2018. Step Sizes and  
591 Rate Constants of Single-headed Cytoplasmic Dynein Measured with  
592 Optical Tweezers. *Sci Rep* **8**:1–14. doi:10.1038/s41598-018-34549-7
- 593 Kishimoto S, Bernardo M, Saito K, Koyasu S, Mitchell JB, Choyke PL, Krishna  
594 MC. 2015. Evaluation of oxygen dependence on in vitro and in vivo  
595 cytotoxicity of photoimmunotherapy using IR-700-antibody conjugates. *Free*  
596 *Radic Biol Med* **85**:24–32. doi:10.1016/j.freeradbiomed.2015.03.038

- 597 Lagadic-Gossmann D, Huc L, Lecureur V. 2004. Alterations of intracellular pH  
598 homeostasis in apoptosis: Origins and roles. *Cell Death Differ* **11**:953–961.  
599 doi:10.1038/sj.cdd.4401466
- 600 Laissue PP, Alghamdi RA, Tomancak P, Reynaud EG, Shroff H. 2017.  
601 Assessing phototoxicity in live fluorescence imaging. *Nat Methods* **14**:657–  
602 661. doi:10.1038/nmeth.4344
- 603 Letai A. 2015. Cell Death and Cancer Therapy: Don't Forget to Kill the Cancer  
604 Cell! *Clin Cancer Res* **21**:5015–5020. doi:10.1158/1078-0432.CCR-15-1204
- 605 Liao PC, Tandarich LC, Hollenbeck PJ. 2017. ROS regulation of axonal  
606 mitochondrial transport is mediated by Ca<sup>2+</sup> and JNK in *Drosophila*. *PLoS*  
607 *One* **12**:1–21. doi:10.1371/journal.pone.0178105
- 608 Li L, Nørrelkke SF, Cox EC. 2008. Persistent cell motion in the absence of  
609 external signals: A search strategy for eukaryotic cells. *PLoS One* **3**.  
610 doi:10.1371/journal.pone.0002093
- 611 Li-Shishido S, Watanabe TM, Tada H, Higuchi H, Ohuchi N. 2006. Reduction in  
612 nonfluorescence state of quantum dots on an immunofluorescence staining.  
613 *Biochem Biophys Res Commun* **351**:7–13. doi:10.1016/j.bbrc.2006.09.159
- 614 Ma Y, Guo S, Pan Y, Fan R, Smith ZJ, Lane S, Chu K. 2019. Quantitative phase  
615 microscopy with enhanced contrast and improved resolution through  
616 ultra-oblique illumination (UO-QPM). *J Biophotonics* 1–13.  
617 doi:10.1002/jbio.201900011
- 618 Maddah M, Heidmann JD, Mandegar MA, Walker CD, Bolouki S, Conklin BR,  
619 Loewke KE. 2015. A non-invasive platform for functional characterization of  
620 stem-cell-derived cardiomyocytes with applications in cardiotoxicity testing.  
621 *Stem Cell Reports* **4**:621–631. doi:10.1016/j.stemcr.2015.02.007
- 622 Maharana S, Munder MC, Ulbricht E, Otto O, Müller P, Franzmann T,  
623 Taubenberger A, Nüske E, Malinowska L, Herbig M, Midtvedt D, Guck J,  
624 Alberti S, Zaburdaev V, Richter D. 2016. A pH-driven transition of the  
625 cytoplasm from a fluid- to a solid-like state promotes entry into dormancy.  
626 *Elife* **5**:1–30. doi:10.7554/elife.09347

- 627 Martindale JL, Holbrook NJ. 2002. Cellular response to oxidative stress:  
628 Signaling for suicide and survival. *J Cell Physiol* **192**:1–15.  
629 doi:10.1002/jcp.10119
- 630 Masuzzo P, Van Troys M, Ampe C, Martens L. 2016. Taking Aim at Moving  
631 Targets in Computational Cell Migration. *Trends Cell Biol* **26**:88–110.  
632 doi:10.1016/j.tcb.2015.09.003
- 633 Mitsunaga M, Ogawa M, Kosaka N, Rosenblum LT, Choyke PL, Kobayashi H.  
634 2011. Cancer cell-selective in vivo near infrared photoimmunotherapy  
635 targeting specific membrane molecules. *Nat Med* **17**:1685–1691.  
636 doi:10.1038/nm.2554
- 637 Murphy MP. 2013. Mitochondrial dysfunction indirectly elevates ROS production  
638 by the endoplasmic reticulum. *Cell Metab* **18**:145–146.  
639 doi:10.1016/j.cmet.2013.07.006
- 640 Nagaya T, Nakamura Y, Sato K, Harada T, Choyke PL, Kobayashi H. 2016.  
641 Near infrared photoimmunotherapy of B-cell lymphoma. *Mol Oncol*  
642 **10**:1404–1414. doi:10.1016/j.molonc.2016.07.010
- 643 Redza-Dutordoir M, Averill-Bates DA. 2016. Activation of apoptosis signalling  
644 pathways by reactive oxygen species. *Biochim Biophys Acta - Mol Cell Res*  
645 **1863**:2977–2992. doi:10.1016/j.bbamcr.2016.09.012
- 646 Sakuma M, Kita S, Higuchi H. 2016. Quantitative evaluation of malignant  
647 gliomas damage induced by photoactivation of IR700 dye Publisher : Taylor  
648 & Francis **6996**. doi:10.1080/14686996.2016.1205936
- 649 Shi H, Kwok RTK, Liu J, Xing B, Tang BZ, Liu B. 2012. Real-time monitoring of  
650 cell apoptosis and drug screening using fluorescent light-up probe with  
651 aggregation-induced emission characteristics. *J Am Chem Soc* **134**:17972–  
652 17981. doi:10.1021/ja3064588
- 653 Tada H, Higuchi H, Wanatabe TM, Ohuchi N. 2007. In vivo real-time tracking of  
654 single quantum dots conjugated with monoclonal anti-HER2 antibody in  
655 tumors of mice. *Cancer Res* **67**:1138–1144.  
656 doi:10.1158/0008-5472.CAN-06-1185

- 657 Tokumitsu A, Wakitani S, Takagi M. 2010. Noninvasive discrimination of human  
658 normal cells and malignant tumor cells by phase-shifting laser microscopy. *J*  
659 *Biosci Bioeng* **109**:499–503. doi:10.1016/j.jbiosc.2009.10.020
- 660 Waters JC. 2009. Accuracy and precision in quantitative fluorescence  
661 microscopy. *J Cell Biol* **185**:1135–1148. doi:10.1083/jcb.200903097
- 662 Yamaguchi Y, Shinotsuka N, Nonomura K, Takemoto K, Kuida K, Yosida H,  
663 Miura M. 2011. Live imaging of apoptosis in a novel transgenic mouse  
664 highlights its role in neural tube closure. *J Cell Biol* **195**:1047–1060.  
665 doi:10.1083/jcb.201104057
- 666 Yildiz A, Selvin PR. 2005. Fluorescence imaging with one nanometer accuracy:  
667 Application to molecular motors. *Acc Chem Res* **38**:574–582.  
668 doi:10.1021/ar040136s
- 669 Zhang G, Gurtu V, Kain SR, Yan G. 1997. Annexin V-FITC Binding Assay.  
670 *Biotechniques* **25**:525–531. doi:[10.2144/97233pf01](https://doi.org/10.2144/97233pf01)
- 671 Zhang Y, Tewson PH, Ding Y, Li J, Enterina JR, Quinn AM, Maysinger D, Mo  
672 GCH, Zhang J, Shen Y, Alford SC, Campbell RE, Zhang I, Hughes TE. 2015.  
673 Ratiometric biosensors based on dimerization-dependent fluorescent  
674 protein exchange. *Nat Methods* **12**:195–198. doi:10.1038/nmeth.3261
